# Supplementary material for: Action-value processing underlies the role of the dorsal anterior cingulate cortex in performance monitoring during self-regulation of affect
Source: PLoS One. 2022 Aug 30;17(8):e0273376. doi: 10.1371/journal.pone.0273376 (PMC9426889; doi:10.1371/journal.pone.0273376)
Supplement: S1 File — (DOCX) [file pone.0273376.s019.docx]

**S1 Proof: Direct proof demonstrating that the expected value of control (EVC) is equivalent to a Q-function with a compound reward that incorporates the cost of action.**

|  | = | [1] |
| --- | --- | --- |
|  | = |  |
|  | = |  |
|  | = |  |
|  | = |  |
|  | = |  |
|  | = |  |
|  | ≡ | [2] |

1. Shenhav A, Botvinick MM, Cohen JD. The Expected Value of Control: An Integrative Theory of Anterior Cingulate Cortex Function. Neuron. 2013 Jul;79(2):217–40.

2. Richard S. Sutton, Andrew G. Barto. Reinforcement Learning: An Introduction. Cambridge, MA: MIT Press; 1998.
